# Supplementary material
Source: publisher figshare collection journal article supplement (https://acs.figshare.com/ndownloader/files/4133887)
Supplement: Supplementary file 1 [file 4133887]

Joshua R. Uzarski, Charlene M. Mello

US Army Natick Soldier Research, Development, and Engineering Center

Natick, MA 07160

University of Massachusetts Dartmouth

Chemistry and Biochemistry Department

North Dartmouth, MA 02747

## **Detection and classification of related lipopolysaccharides via a small array of immobilized antimicrobial peptides**

The following supplemental information provides further detailed experimental and analysis procedures. Experimental data is presented supporting the mathematical treatment of lipopolysaccharide binding data to immobilized antimicrobial peptides via surface plasmon resonance. More detailed data tables resulting from linear discriminant analysis calculations are presented to support the data presented in the main text. A detailed explanation of the surface-dependent properties of the immobilized antimicrobial peptides is offered.

### Table of Contents

|                                                                 |     |
|-----------------------------------------------------------------|-----|
| S1. Surface Derivatization Reactions for RAIRS characterization | S-2 |
| S2. Peptide Immobilization on SPR Substrates                    | S-2 |
| S3. LPS Binding                                                 | S-3 |

|                                                   |      |
|---------------------------------------------------|------|
| S4. Correction for Peptide Binding Affinity Decay | S-4  |
| S5. Peptide-LPS Binding Decay Correction Data     | S-12 |
| S6. LPS Discrimination and Classification         | S-14 |
| S7. Antimicrobial Peptide Properties              | S-18 |

## **S1. Surface Derivatization Reactions for RAIRS characterization**

Surface derivitization reactions for IR characterization proceeded as follows. The mixed OEG-SAM was placed into a custom sample holder and 200  $\mu\text{L}$  of a 25 mM solution of *N*-[ $\gamma$ -maleimidobutyryloxy]sulfo-succinimide ester (sulfo-GMBS) in 0.1 M borate buffer, pH 8.5 was placed on top. The surface was incubated at room temperature for 20 minutes after which the surface was removed, rinsed with deionized  $\text{H}_2\text{O}$ , and dried with UHP  $\text{N}_2$ . RAIR spectra were collected to verify the presence of new terminal maleimide moieties and the surface was placed back into a new well of the custom sample holder. A 200  $\mu\text{L}$  aliquot of a 10 mM solution of the desired peptide in 0.1 M PBS, pH 6.5 was placed on top of the slide for 1 to 20 hours at room temperature. The surface was then removed, rinsed with the same PBS followed by DI  $\text{H}_2\text{O}$  and dried with UHP  $\text{N}_2$ . RAIR spectra were immediately recorded. Vibrational mode assignments were made via literature precedent as outlined in the text.

## **S2. Peptide Immobilization on SPR Substrates**

For each new surface, the system was first primed with running buffer (PBS pH 6.5). Next, the detector response was normalized to all four flow channels using the glycerol containing normalization solution provided by Biacore. After normalization, ligands were independently immobilized to each flow channel as follows. First, 50 mM sulfo-GMBS dissolved in 0.1M borate buffer, pH 8.5 was injected for 240 seconds at a flow rate of 10  $\mu\text{L}/\text{min}$ . Sulfo-GMBS reacts with the terminal primary amine groups of the mixed SAM to form a stable amide linkage connected to a new terminal maleimide

moiety, which is subsequently used to covalently bind the thiol groups of terminal cysteine residues via the formation of thioether bonds.<sup>9</sup> For the cysteine reference ligand in flow channel 1, 50 mM cysteine dissolved in running buffer was next injected for 240 seconds. For the peptide ligands in channels 2-4, the peptide solution was injected using the Target RU command of the Biacore software, which instructs the instrument to inject ligand solution in small volume pulses at 5  $\mu$ L/min until a preset immobilization RU value is reached. After the target is reached, 50 mM cysteine is injected for 240 seconds at 10  $\mu$ L/min to passivate any unreacted maleimide groups. The flow channels were always immobilized in numerical order.

### **S3. LPS Binding**

Quantification of LPS binding to each peptide was determined using a custom method with 0.1M phosphate buffer, pH 7.4 containing 137 mM NaCl and 0.01% P20 surfactant as the running buffer. The first three cycles were conditioning cycles where buffer was used as the injected analyte instead of LPS. These initial cycles help equilibrate the surface and remove any loosely bound material from the surface. LPS samples were divided into two sets; a training set and a validation set. Each set was prepared independently from the same 1 mg/mL stock LPS solutions. Beginning with cycle 5, the LPS training data set was analyzed in sequential order with four replicate measurements per five LPS samples for a total of 20 cycles. The four replicates of each LPS were analyzed sequentially. The validation set was analyzed next, but in random order, again with 4 replicates per five LPS samples. Each injection cycle proceeded as follows: First, the 10  $\mu$ g/mL LPS sample is injected over all four flow channels (in order from 1 to 4) at 10  $\mu$ L/min for 300 seconds after which the flow is reverted back to running buffer. After a dissociation time of 120 seconds, the surface is regenerated using a solution of 50 mM NaOH with 30% acetonitrile and 0.1% Tween 20 surfactant injected for 30 seconds at a flow rate of 50  $\mu$ L/min. An injection of running buffer follows for 30 seconds at 50  $\mu$ L/min to remove the basic regeneration solution from the surface. The system is then allowed to equilibrate with running buffer for six minutes before moving on to the next cycle. The amount of bound LPS is determined by

measuring the binding response five seconds after the termination of sample injection. The slight delay in measurement allows the response to adjust for any bulk refractive index differences between the running buffer and sample solutions. All of the responses reported have been reference subtracted, i.e the response of the reference cysteine channel (FC1) has been subtracted from the response of the ligand channel (FC2,3,4). The response of the reference channel also serves as a negative control to monitor non-specific binding.

#### **S4. Correction for Peptide Binding Affinity Decay**

Despite no observation of a decrease in immobilized peptide density, the binding of LPS decreased as a function of time. This phenomenon is known to the SPR biosensing community and was addressed by Ober et al. where they corrected for the time-dependent response decay using an exponential function applied to kinetic data. The time-dependent decrease of peptide binding affinity in our system is deleterious to linear discriminant analysis based classification as significant within-group variation leads to poor discrimination. A method was therefore developed and modeled after the aforementioned study by Ober et al. to correct for peptide activity loss by following the response of a control analyte throughout the course of the entire experiment. The control data set for each of the three peptides was fit with a unique exponential decay function. The measured binding response at a particular cycle number (time) was corrected by a factor determined by the ratio of the maximum response at the initial time to the calculated response determined by the fitting function. Figure S1 shows the time-dependent response of 10  $\mu\text{g/mL}$  LPS from *E. coli* O111:B4 to immobilized SMAP-29 along with the exponential decay fit and the resultant corrected data. The binding decay is a consequence of peptide activity loss and not LPS activity loss as injecting a freshly prepared LPS sample after the presented analysis resulted in a similar binding response to that of latter cycles ( $>40$ ), indicating that the activity loss is peptide dependent. Further evidence for the lack of peptide loss is shown in Figure S3 where the absolute instrument baseline of each immobilized peptide channel was monitored as a function of cycle number.

The absence of significant baseline decrease supports the assumption of minimal peptide desorption during the experiment.

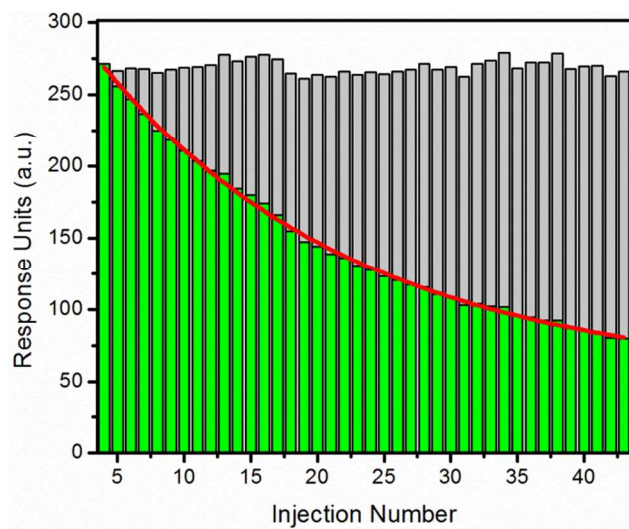

Figure S1: Binding response of 10  $\mu\text{g/mL}$  LPS from *E. coli* O111:B4 to immobilized SMAP-29 as a function of injection number. The green bars are the raw data and the grey bars are the same data corrected to the exponential decay function (red trace) fit to the raw data.

The binding activity of the peptides was observed to decay as a function of cycle (or time) independent of LPS activity. To correct for the peptide activity loss, a control data set was collected where regular measurements of *E. coli* O111:B4 LPS binding to the three immobilized peptides were collected over the course of the entire experiment. Figure S2 below shows the binding of the control LPS to the three peptides. The response of each peptide was fit to an exponential decay of the type

$$y = A_1 * \exp\left(-x/t_1\right) + y_0.$$

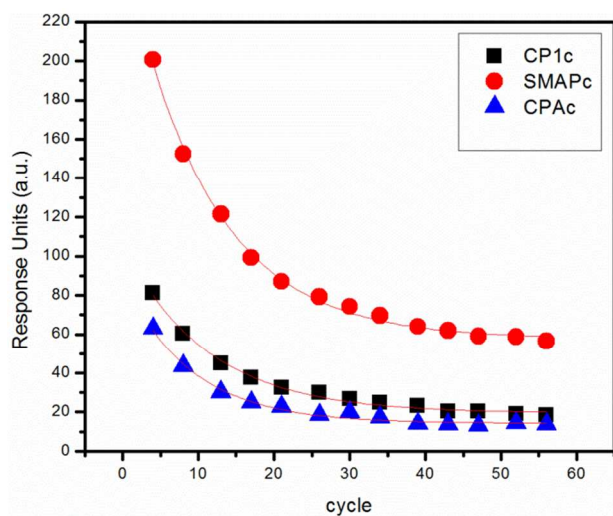

Figure S 2: Binding of 10 ug/mL LPS of *E. coli* O111:B4 as a function of cycle number (time).

|                 |                                 |          |            |
|-----------------|---------------------------------|----------|------------|
| Model           | ExpDec1                         |          |            |
| Equation        | $y = A1 \cdot \exp(-x/t1) + y0$ |          |            |
| Reduced Chi-Sqr | 2.07351                         | 5.27618  | 2.15997    |
| Adj. R-Square   | 0.99402                         | 0.99719  | 0.98984    |
|                 |                                 | Value    | Std. Error |
| CP1c            | y0                              | 19.43542 | 0.78501    |
|                 | A1                              | 86.72272 | 2.68175    |
|                 | t1                              | 11.11162 | 0.6113     |
| SMAPc           | y0                              | 57.69456 | 1.24754    |
|                 | A1                              | 202.2681 | 4.29448    |
|                 | t1                              | 11.06744 | 0.41657    |
| CPAc            | y0                              | 14.2407  | 0.66732    |
|                 | A1                              | 75.12133 | 3.45846    |
|                 | t1                              | 8.86338  | 0.6061     |

Table S 1: Exponential decay fit parameters for the data in Figure S1.



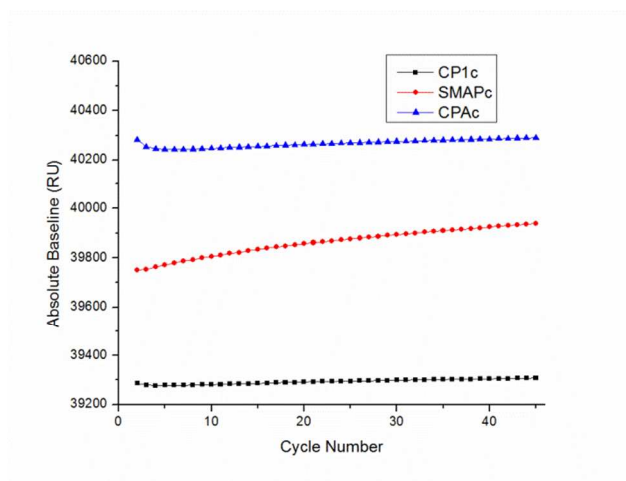

Figure S3: Plot of the absolute baseline response versus cycle number for the three antimicrobial peptides CP1c, SMAPc, and CPAc. The slightly increasing baseline over time supports the assumption of little to no peptide desorption during the experiment.

To verify that a single LPS strain could be used for the activity decay correction of all the LPS molecules tested, a separate experiment was performed to verify the similar activity decay profiles of all the LPS. Briefly, each of the five LPS strains was tested for binding over binding a total of ten times in sequential order (LPS 1,2,3,4,5,1,2,3,4,5,...). To compare the activity decay, plots of the natural log of the cycle number versus the natural log of the uncorrected binding for each LPS strain were prepared; these plots are seen in Figure S4. For each peptide, the log-transformed decay profiles of each LPS are visually similar, suggesting that the time dependent binding activity loss is a function of the peptide and not the LPS. Furthermore, these data justified the use of a single LPS strain for monitoring the binding activity decay of every LPS strain.

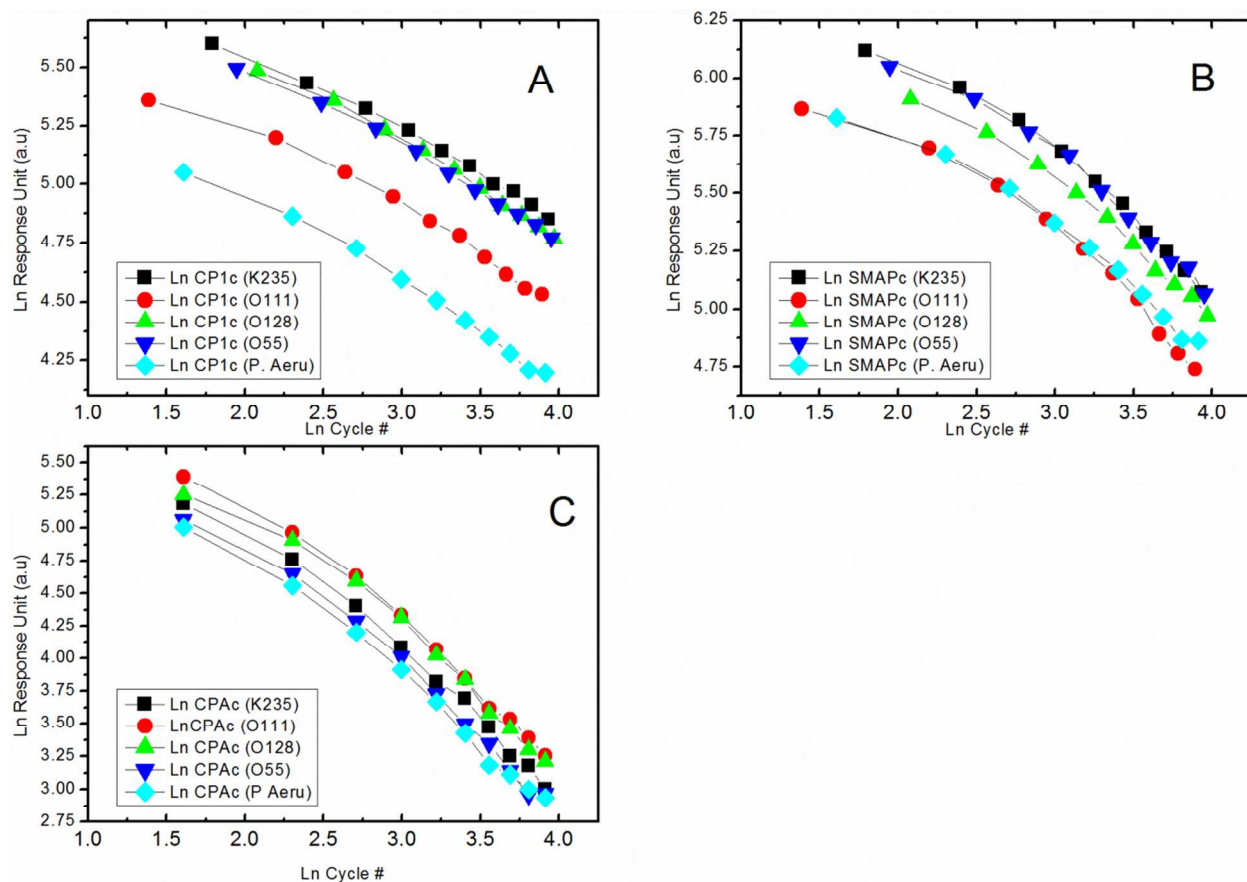

Figure S 4: Natural log plots of cycle number (time) versus binding for the five LPS strains to the three immobilized AMPS; A) CP1c, B) SMAPc, and C) CPAc.

## **S5. Peptide-LPS Binding Decay Correction Data**

The data used for discrimination was corrected for peptide binding activity decay as described above. Table S2 shows the raw uncorrected data and the corresponding corrected data along with pertinent statistics.

| LPS        | CP1c<br>Avg | CP1c<br>RSD | SMAPc<br>Avg | SMAPc<br>RSD | CPAc<br>Avg | CPAc<br>RSD |
|------------|-------------|-------------|--------------|--------------|-------------|-------------|
| K235 A     | 46.06       | 8.00%       | 87.35        | 12.72%       | 25.58       | 9.83%       |
| K235 A*    | 95.90       | 1.75%       | 170.15       | 5.73%        | 64.27       | 5.22%       |
| K235 B     | 29.67       | 11.14%      | 42.07        | 6.11%        | 13.41       | 8.78%       |
| K235 B*    | 94.76       | 6.13%       | 132.12       | 2.64%        | 55.09       | 6.15%       |
| O111 A     | 64.37       | 13.52%      | 158.03       | 11.23%       | 46.37       | 11.52%      |
| O111 A*    | 76.52       | 3.05%       | 185.98       | 1.67%        | 57.69       | 2.40%       |
| O111 B     | 20.83       | 8.79%       | 65.76        | 1.17%        | 14.95       | 6.35%       |
| O111 B*    | 81.82       | 7.64%       | 218.56       | 1.88%        | 64.03       | 6.25%       |
| O128 A     | 37.73       | 4.84%       | 70.19        | 4.97%        | 19.12       | 11.81%      |
| O128 A*    | 111.86      | 3.07%       | 185.57       | 1.50%        | 66.72       | 9.40%       |
| O128 B     | 22.53       | 14.09%      | 59.39        | 10.45%       | 12.14       | 27.01%      |
| O128 B*    | 98.96       | 7.92%       | 184.06       | 5.52%        | 49.06       | 23.23%      |
| O55 A      | 32.48       | 7.41%       | 64.71        | 1.73%        | 20.54       | 6.80%       |
| O55 A*     | 83.05       | 2.74%       | 151.35       | 3.59%        | 62.39       | 1.24%       |
| O55 B      | 22.40       | 14.59%      | 43.74        | 12.74%       | 14.52       | 19.60%      |
| O55 B*     | 82.10       | 8.13%       | 137.50       | 7.09%        | 59.50       | 16.32%      |
| P. aeru A  | 22.83       | 10.59%      | 101.48       | 5.15%        | 27.97       | 7.29%       |
| P. aeru A* | 41.41       | 2.94%       | 157.44       | 3.30%        | 50.55       | 4.94%       |
| P. aeru B  | 12.49       | 13.69%      | 60.18        | 11.65%       | 16.36       | 17.50%      |
| P. aeru B* | 44.61       | 6.50%       | 185.41       | 5.17%        | 65.85       | 12.96%      |

Table S 2: Raw and corrected LPS binding data. The data are the average of four replicate measurements along with the percent relative standard deviation (RSD; standard deviation/average). For each data set, the asterisk-labeled set was corrected using the described decay correction process.

## **S6. LPS Discrimination and Classification**

LPS samples were classified using the corrected binding data subjected to linear discriminant analysis. The classification functions were generated using corrected Data Set A, which was collected in sequential order first. The classification was then verified using corrected Data Set B subjected to the classification functions generated from Data Set A. Table S3 below shows the Mahalanobis distances of each data point to the centroid of each LPS strain. The data point was assigned to the strain with the shortest distance. Red shaded cases were misclassified.

| Group         | Data Set |   |         |         |          |         |          |
|---------------|----------|---|---------|---------|----------|---------|----------|
|               | Case     |   | K235    | O111    | O128     | O55     | P aeru   |
| Group K235    | 1        | A | 8.217   | 116.398 | 20.851   | 129.675 | 868.008  |
|               | 2        | A | 2.012   | 75.608  | 56.992   | 65.488  | 709.017  |
|               | 3        | A | 3.687   | 108.101 | 44.196   | 75.883  | 776.32   |
|               | 4        | A | 3.383   | 102.242 | 58.198   | 65.055  | 744.177  |
|               | 21       | B | 40.421  | 189.377 | 90.303   | 91.34   | 843.023  |
|               | 22       | B | 58.052  | 175.187 | 127.428  | 73.783  | 757.365  |
|               | 23       | B | 50.435  | 130.104 | 145.237  | 38.123  | 642.575  |
|               | 24       | B | 51.302  | 146.21  | 137.481  | 49.323  | 684.388  |
| Group O111    | Case     |   | K235    | O111    | O128     | O55     | P aeru   |
|               | 5        | A | 80.786  | 0.903   | 203.923  | 47.45   | 398.754  |
|               | 6        | A | 95.853  | 0.111   | 231.937  | 46.153  | 361.27   |
|               | 7        | A | 103.834 | 0.341   | 238.655  | 53.955  | 359.007  |
|               | 8        | A | 106.744 | 0.814   | 252.593  | 41.714  | 331.393  |
|               | 25       | B | 70.566  | 73.317  | 110.035  | 168.169 | 730.723  |
|               | 26       | B | 90.018  | 47.854  | 152.894  | 152.178 | 624.951  |
|               | 27       | B | 167.505 | 59.756  | 271.02   | 187.472 | 526.259  |
|               | 28       | B | 146.709 | 53.625  | 227.074  | 186.493 | 568.45   |
| Group O128    | Case     |   | K235    | O111    | O128     | O55     | P aeru   |
|               | 9        | A | 27.113  | 191.789 | 2.558    | 198.762 | 1,057.28 |
|               | 10       | A | 51.124  | 263.924 | 2.088    | 256.437 | 1,209.73 |
|               | 11       | A | 48.384  | 254.748 | 1.401    | 250.884 | 1,192.82 |
|               | 12       | A | 49.778  | 227.94  | 7.415    | 231.099 | 1,124.72 |
|               | 29       | B | 31.793  | 167.086 | 9.697    | 192.291 | 1,004.71 |
|               | 30       | B | 51.811  | 197.915 | 13.898   | 229.094 | 1,072.85 |
|               | 31       | B | 47.982  | 132.01  | 49.296   | 161.477 | 872.535  |
|               | 32       | B | 107.074 | 235.983 | 70.32    | 259.851 | 1,072.86 |
| Group O55     | Case     |   | K235    | O111    | O128     | O55     | P aeru   |
|               | 13       | A | 85.592  | 65.303  | 239.907  | 1.636   | 402.133  |
|               | 14       | A | 57.801  | 55.508  | 191.37   | 2.543   | 451.043  |
|               | 15       | A | 81.422  | 35.987  | 232.907  | 0.898   | 368.652  |
|               | 16       | A | 101.532 | 37.85   | 267.083  | 2.469   | 329.296  |
|               | 33       | B | 96.034  | 70.809  | 257.941  | 3.157   | 388.777  |
|               | 34       | B | 68.521  | 85.051  | 207.906  | 9.275   | 479.102  |
|               | 35       | B | 124.253 | 91.492  | 302.385  | 10.494  | 368.199  |
|               | 36       | B | 130.816 | 103.914 | 290.693  | 20.757  | 401.759  |
| Group P. aeru | Case     |   | K235    | O111    | O128     | O55     | P aeru   |
|               | 17       | A | 748.873 | 352.732 | 1,117.58 | 366.638 | 1.101    |
|               | 18       | A | 733.483 | 342.771 | 1,100.81 | 356.503 | 0.914    |
|               | 19       | A | 799.355 | 377.299 | 1,175.14 | 410.115 | 0.75     |
|               | 20       | A | 803.034 | 379.976 | 1,182.08 | 414.846 | 1.759    |
|               | 37       | B | 872.949 | 423.827 | 1,260.94 | 492.574 | 37.281   |
|               | 38       | B | 951.758 | 477.864 | 1,355.82 | 547.827 | 39.673   |
|               | 39       | B | 832.412 | 399.072 | 1,213.22 | 463.436 | 38.645   |
|               | 40       | B | 740.634 | 327.704 | 1,099.56 | 385.835 | 10.14    |

Table S 3: Calculated Mahalanobis distances of each data point from the centroid of each group (LPS strain). Misclassified cases are outlined and shaded in red.

Table S4 shows the group classification of each data point based on the Mahalanobis distances.



Training Data  
Classification  
(Set A)

(cases in row categories classified into columns)

|        | K235 | O111 | O128 | O55 | P AERU | %correct |
|--------|------|------|------|-----|--------|----------|
| K235   | 4    | 0    | 0    | 0   | 0      | 100      |
| O111   | 0    | 4    | 0    | 0   | 0      | 100      |
| O128   | 0    | 0    | 4    | 0   | 0      | 100      |
| O55    | 0    | 0    | 0    | 4   | 0      | 100      |
| P AERU | 0    | 0    | 0    | 0   | 4      | 100      |
| Total  | 4    | 4    | 4    | 4   | 4      | 100      |

Jackknifed  
Verification  
Data (leave-  
one-out method)

|        | K235 | O111 | O128 | O55 | P AERU | %correct |
|--------|------|------|------|-----|--------|----------|
| K235   | 3    | 0    | 1    | 0   | 0      | 75       |
| O111   | 0    | 4    | 0    | 0   | 0      | 100      |
| O128   | 0    | 0    | 4    | 0   | 0      | 100      |
| O55    | 0    | 0    | 0    | 4   | 0      | 100      |
| P AERU | 0    | 0    | 0    | 0   | 4      | 100      |
| Total  | 3    | 4    | 5    | 4   | 4      | 95       |

Verification Data  
Classification  
(Set B)

|        | K235 | O111 | O128 | O55 | P AERU | %correct |
|--------|------|------|------|-----|--------|----------|
| K235   | 2    | 0    | 0    | 2   | 0      | 50       |
| O111   | 1    | 3    | 0    | 0   | 0      | 75       |
| O128   | 1    | 0    | 3    | 0   | 0      | 75       |
| O55    | 0    | 0    | 0    | 4   | 0      | 100      |
| P AERU | 0    | 0    | 0    | 0   | 4      | 100      |
| Total  | 4    | 3    | 3    | 6   | 4      | 80       |

Table S 4: Group classifications of each data point. The training data set (Set A) was used to generate classification functions and the Validation Set (dataset B) was used to test the classification functions on independent data. The jackknifed data generates classification functions for each data point while leaving the tested data out.

## **S7. Antimicrobial Peptide Properties.**

The natural antimicrobial peptides used in our study exhibit different physical and chemical properties which we hypothesize to be responsible for their discriminatory binding capabilities. Table S5 lists the reported and calculated values of some of these properties.

| Name  | Charge | Hydrophobicity | Hydrophobic Moment | Polar% | Non-polar % | Spatial Charge Density | Spatial Hydroph. Density | Spatial Denisty Ratio |
|-------|--------|----------------|--------------------|--------|-------------|------------------------|--------------------------|-----------------------|
| CP1c  | 5      | 0.231          | 0.256              | 59.38% | 40.63%      | 128.155                | 343.852                  | 2.683                 |
| SMApC | 9      | 0.331          | 0.441              | 53.33% | 46.67%      | 257.659                | 294.700                  | 1.144                 |
| CPAc  | 6      | 0.319          | 0.234              | 47.22  | 52.78       | 222.585                | 448.786                  | 2.016                 |
| cCP1  | 5      | 0.231          | 0.247              | 59.38% | 40.63%      | 101.175                | 350.042                  | 3.460                 |

Table S 5: Select properties of immobilized antimicrobial peptides. See supplemental text for descriptions.

The charge, hydrophobicity, hydrophobic moment, polar and non-polar% were obtained via the online HeliQuest software available at <http://heliquest.ipmc.cnrs.fr>. The last three properties were calculated by us and are dependent on peptide immobilization orientation, the explanation of which is aided by Figure S4. Individual residues are assigned an increasing numerical value dependent on distance from the surface. For the charge density calculation, a cationic residue is assigned a value of 1, an anionic residue -1, and a neutral residue 0. The charge-assigned value is then multiplied by the distance dependent numerical value, resulting in charged residues further from the surface having a higher charge density value than those closer to the surface. The sum of the charge density values for each residue of the sequence is then taken to provide the overall spatial charge density. The spatial hydrophobicity is determined similarly, but rather than assigning 1,-1, or 0, the unique hydrophobicity of each residue (determined by Black and Mould) is used and multiplied by the same distance dependent numerical value. The spatial density ratio is simply the ratio of the spatial hydrophobicity to the spatial charge density. The trend is that peptides with charge localized closer to the solution will have smaller ratios than those with charge closer to the surface.

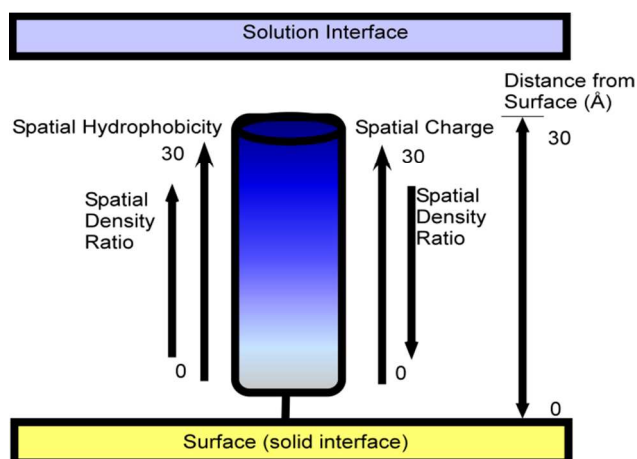

Figure S 4: Graphical representation of the spatially dependent physiochemical properties used to analyze LPS binding. A peptide molecule, represented by the blue cylinder, is attached to a solid surface and extends into the solution interface. The spatial dependent charge and hydrophobicity of an individual residue increase as it gets farther from the solid interface and closer to the solution interface. The spatial density ratio is directly proportional to the spatial hydrophobicity and inversely proportional to the spatial charge.
